# Supplementary material for: E-diary use in clinical headache practice: A prospective observational study
Source: PubMed Central journal article supplement — Cephalalgia. 2021 May 2;41(11-12):1161–71. doi: 10.1177/03331024211010306 (PMC8504420; doi:10.1177/03331024211010306), 2021-05-02
Supplement: sj-pdf-1-cep-10.1177_03331024211010306.pdf [file sj-pdf-1-cep-10.1177_03331024211010306.pdf]

## Supplementary information

All new headache patients referred to the Leiden Headache Clinic

Screening E-headache-questionnaire

### Classified as migraine patient when:

*Migraine without aura:* headache and accompanying symptoms (moderate to severe intensity / throbbing / unilateral / aggravated by physical exercise / photophobia / phonophobia / nausea / vomiting) with duration of 4-72 hours (according to ICHD-3 criteria)

*Migraine with aura:* visual disturbances lasting 5-60 minutes (*e.g.* shitters/ stars/ flashing lights/ scintillating lines/ coloured spots/ trembling air sensations/ wet windows glass/ loss of vision/ diplopia) (according ICHD-3 criteria)

Extended E-migraine-questionnaire

E-diary

Visit at Headache

### Classified as potential migraine patient when:

Severe headache attacks with duration of  $\geq 4$  hours or aura symptoms/(previous) use of migraine-specific medication/self- or physician-diagnosed

### Classified as migraine and/or aura day when:

Day with headache and accompanying symptoms according to ICHD-3 criteria (moderate to severe intensity / throbbing / unilateral / aggravated by physical exercise / photophobia / phonophobia / nausea / vomiting) and duration  $\geq 4$  hours; or visual aura symptoms lasting 5-60 minutes (also classified as aura day); or headache/aura day with intake of triptan(s)
